# Supplementary material for: Use of hemostatic powder in treatment of upper gastrointestinal bleeding: a systematic review and meta-analysis
Source: PubMed Central journal article supplement — Endosc Int Open. 2019 Dec 2;7(12):E1704–13. doi: 10.1055/a-0977-2897 (PMC6887646; doi:10.1055/a-0977-2897), 2019-12-02
Supplement: 1544supmat-10-1055-a-0977-2897.pdf [file 1544supmat-10-1055-a-0977-2897.pdf]

## Supplementary material

**Table 1s.** Joanna Briggs Institute Critical Appraisal Checklist for Case Series results for the 50 studies selected.

| Author (year)                  | Checklist items |     |     |     |     |     |     |     |     |     |
|--------------------------------|-----------------|-----|-----|-----|-----|-----|-----|-----|-----|-----|
|                                | 1               | 2   | 3   | 4   | 5   | 6   | 7   | 8   | 9   | 10  |
| da Costa L et al. (2018)       | No              | Yes | Yes | No  | No  | No  | Yes | Yes | No  | Yes |
| Martins B 2018                 | Yes             | Yes | Yes | Yes | No  | Yes | No  | Yes | Yes | Yes |
| Thomson et al. (2018)          | No              | Yes | Yes | Yes | No  | Yes | Yes | Yes | No  | Yes |
| Ibrahim et al. (2018)          | Yes             | Yes | Yes | No  | No  | Yes | Yes | Yes | Yes | Yes |
| Pittayanon et al. (2018)       | No              | Yes | Yes | No  | No  | Yes | Yes | Yes | Yes | Yes |
| Cahyadi et al. (2017)          | No              | Yes | Yes | No  | No  | Yes | Yes | Yes | Yes | Yes |
| Chen et al. (2017)             | Yes             | Yes | Yes | No  | No  | Yes | Yes | Yes | Yes | Yes |
| Alzoubaidi et al. (2017)       | No              | Yes | Yes | No  | No  | No  | Yes | Yes | No  | Yes |
| Appleby & Hoare (2017)         | No              | Yes | Yes | No  | No  | No  | No  | Yes | No  | Yes |
| Thayalasekaran et al. (2017)   | No              | Yes | Yes | No  | No  | No  | Yes | Yes | No  | Yes |
| Alzoubaidi et al. (2017)       | No              | Yes | Yes | No  | No  | No  | Yes | Yes | Yes | Yes |
| Kwek et al. (2017)             | Yes             | Yes | Yes | No  | No  | Yes | Yes | Yes | Yes | Yes |
| Arena et al. (2017)            | No              | Yes | Yes | No  | No  | Yes | Yes | Yes | Yes | Yes |
| Hagel et al. (2017)            | Yes             | Yes | Yes | Yes | No  | Yes | Yes | Yes | Yes | Yes |
| Häberle et al. (2017)          | No              | Yes | Yes | Yes | No  | No  | Yes | Yes | No  | Yes |
| Eusebi et al. (2017)           | No              | Yes | Yes | No  | No  | Yes | Yes | Yes | Yes | Yes |
| Meng et al. 2017)              | No              | Yes | Yes | No  | No  | Yes | No  | Yes | Yes | Yes |
| Giles et al. (2016)            | No              | Yes | Yes | No  | No  | No  | No  | Yes | No  | Yes |
| Haddara et al. (2016)          | Yes             | Yes | Yes | No  | No  | Yes | Yes | Yes | Yes | Yes |
| Sinha et al. (2016)            | Yes             | Yes | Yes | Yes | No  | Yes | Yes | Yes | Yes | Yes |
| Ting et al. (2016)             | No              | Yes | Yes | No  | No  | Yes | No  | Yes | Yes | Yes |
| Sonthalia et al. (2016)        | No              | Yes | Yes | No  | No  | No  | No  | Yes | No  | Yes |
| Sokpon et al. (2016)           | No              | Yes | Yes | No  | No  | Yes | No  | Yes | No  | Yes |
| Pittayanon et al. (2016)       | Yes             | Yes | Yes | No  | No  | Yes | Yes | Yes | Yes | Yes |
| Vivar et al. (2016)            | Yes             | Yes | Yes | Yes | Yes | Yes | Yes | Yes | Yes | Yes |
| Nasr et al. (2016)             | No              | Yes | Yes | No  | No  | No  | No  | Yes | Yes | Yes |
| Hanna & Wurm (2015)            | No              | Yes | Yes | No  | No  | Yes | No  | Yes | Yes | Yes |
| Dhesi et al. (2015)            | No              | Yes | Yes | No  | No  | Yes | Yes | Yes | No  | Yes |
| Ibrahim et al. (2015)          | Yes             | Yes | Yes | Yes | No  | Yes | Yes | Yes | Yes | Yes |
| Disney et al. (2015)           | Yes             | Yes | Yes | No  | No  | Yes | Yes | Yes | Yes | Yes |
| Widlak et al. (2015)           | Yes             | Yes | Yes | No  | No  | Yes | No  | No  | Yes | No  |
| Dixon et al. (2015)            | No              | Yes | Yes | Yes | No  | Yes | No  | Yes | Yes | Yes |
| Malik et al. (2015)            | No              | Yes | Yes | No  | No  | Yes | Yes | Yes | Yes | Yes |
| Jang et al. (2015)             | Yes             | Yes | Yes | No  | No  | No  | No  | Yes | Yes | Yes |
| Szalai et al. (2015)           | No              | Yes | Yes | No  |
| Minelli Grazioli et al. (2015) | No              | Yes | Yes | No  | No  | Yes | Yes | No  | Yes | Yes |
| Chen et al. (2015)             | Yes             | Yes | Yes | Yes | No  | Yes | Yes | Yes | Yes | Yes |
| Smith et al. (2014)            | Yes             | Yes | Yes | No  | No  | Yes | Yes | Yes | Yes | Yes |
| Masci et al. (2014)            | Yes             | Yes | Yes | No  | No  | Yes | Yes | Yes | Yes | Yes |
| Disney et al. (2014)           | No              | Yes | Yes | No  | No  | Yes | Yes | Yes | Yes | Yes |
| Ali et al. (2014)              | No              | Yes | Yes | No  | No  | No  | Yes | Yes | Yes | Yes |
| Sagar & Iqbal (2014)           | No              | Yes | Yes | No  | No  | Yes | Yes | Yes | Yes | Yes |
| Barkun et al. (2014)           | Yes             | Yes | Yes | No  | No  | Yes | No  | Yes | No  | Yes |
| Sulz et al. (2014)             | Yes             | Yes | Yes | Yes | No  | Yes | Yes | Yes | Yes | Yes |
| Yau et al. (2014)              | Yes             | Yes | Yes | No  | No  | Yes | Yes | Yes | Yes | Yes |
| Ibrahim et al. (2013)          | Yes             | Yes | Yes | Yes | No  | Yes | Yes | Yes | Yes | Yes |
| Mangiavillano et al. (2013)    | No              | Yes | Yes | No  | No  | Yes | No  | Yes | Yes | Yes |
| Holster et al. (2012)          | Yes             | Yes | Yes | Yes | No  | Yes | Yes | Yes | Yes | Yes |
| Chen et al. (2012)             | Yes             | Yes | Yes | No  | No  | Yes | Yes | Yes | Yes | Yes |
| Sung et al. (2011)             | Yes             | Yes | Yes | Yes | No  | Yes | Yes | Yes | Yes | Yes |

Checklist items: 1. Were there clear criteria for inclusion in the case series?; 2. Was the condition measured in a standard, reliable way for all participants included in the case series?; 3. Were valid methods used for identification of the condition for all participants included in the case series?; 4. Did the case series have consecutive inclusion of participants?; 5. Did the case series have complete inclusion of participants?; 6. Was there clear reporting of the demographics of the participants in the study?; 7. Was there clear reporting of clinical information of the participants?; 8. Were the outcomes or follow up results of cases clearly reported?; 9. Was there clear reporting of the presenting site(s)/clinic(s) demographic information?; 10. Was the statistical analysis appropriate?

# General use - Hemostasis

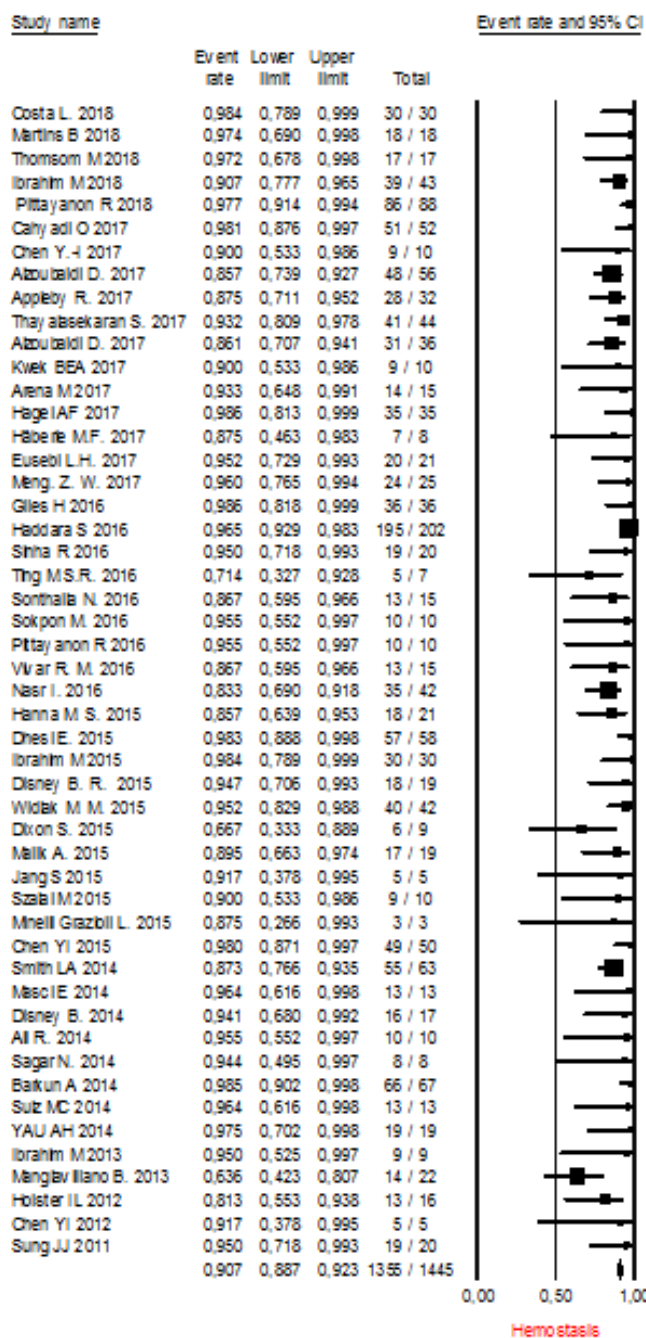

# General use - Rebleeding

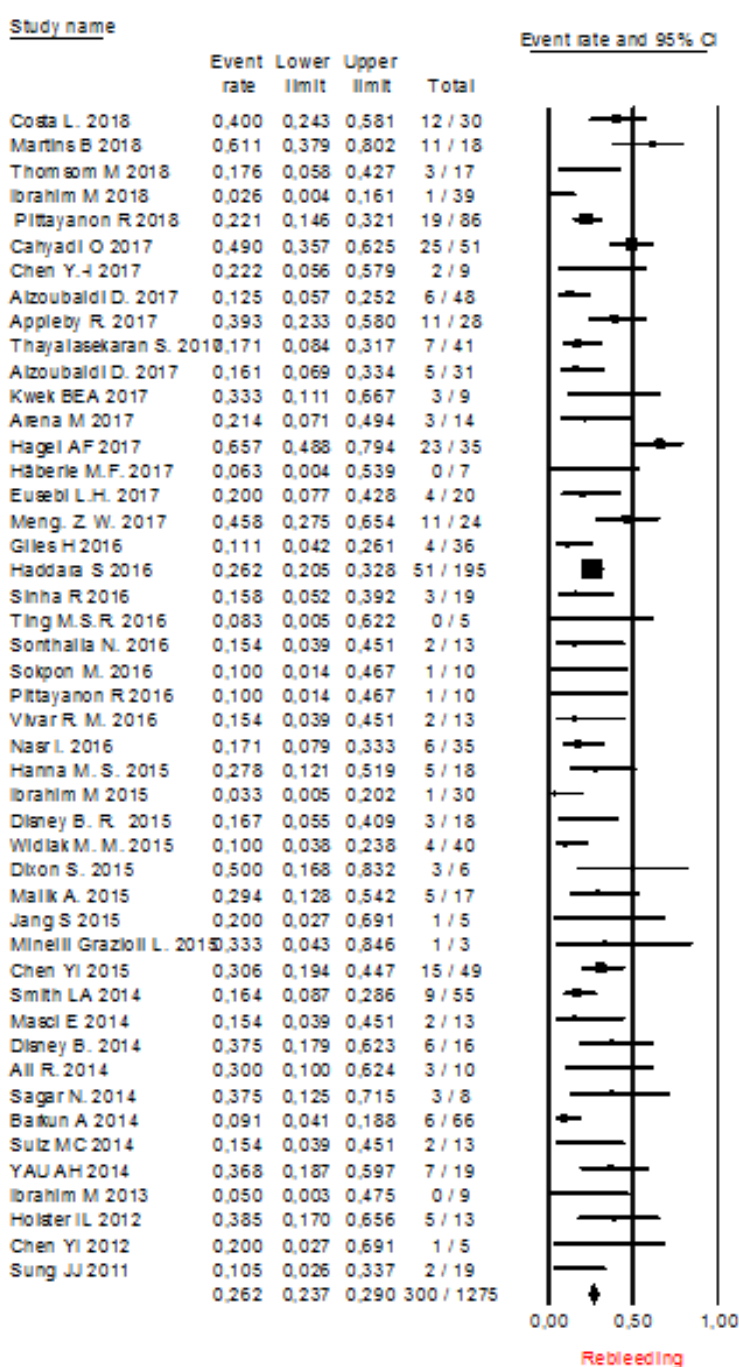

Fig. 1s Initial hemostasis rates after the general use of TC-325.

Fig. 2s Rebleeding rates after the general use of TC-325.

## Peptic Ulcer - Hemostasis

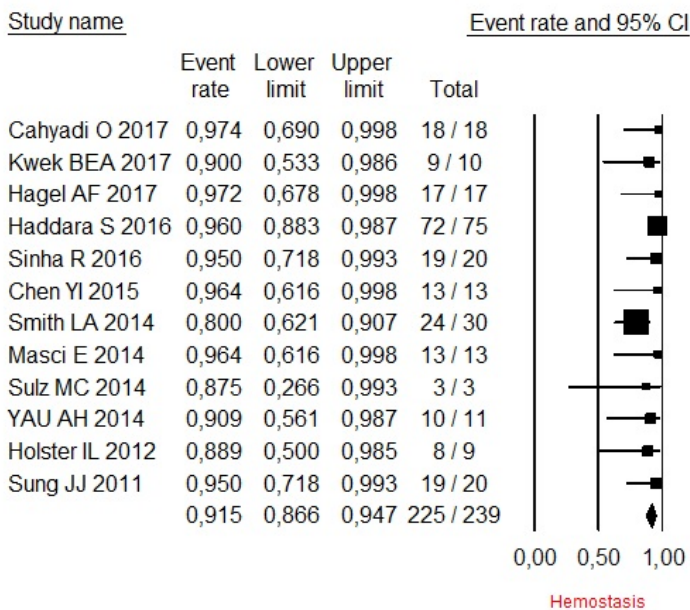

Fig. 3s Initial hemostasis rates after TC-325 use in bleeding from peptic ulcers.

## Peptic Ulcer - Rebleeding

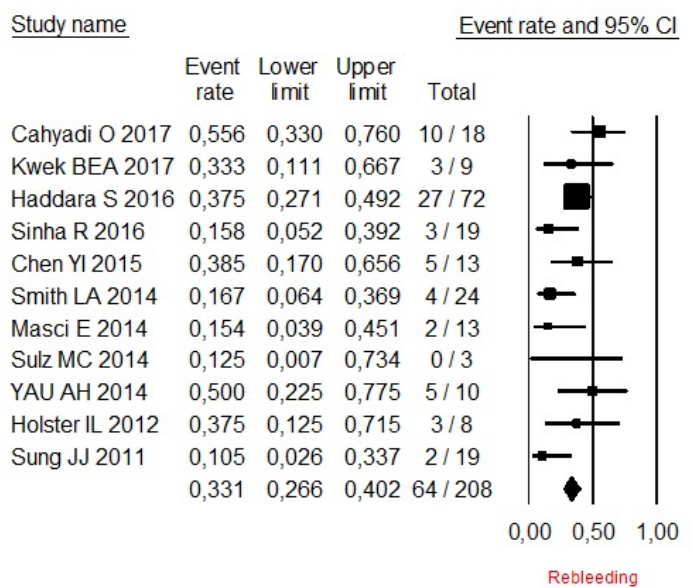

Fig. 4s Rebleeding rates after TC-325 use in bleeding from peptic ulcers.

## Neoplasm - Hemostasis

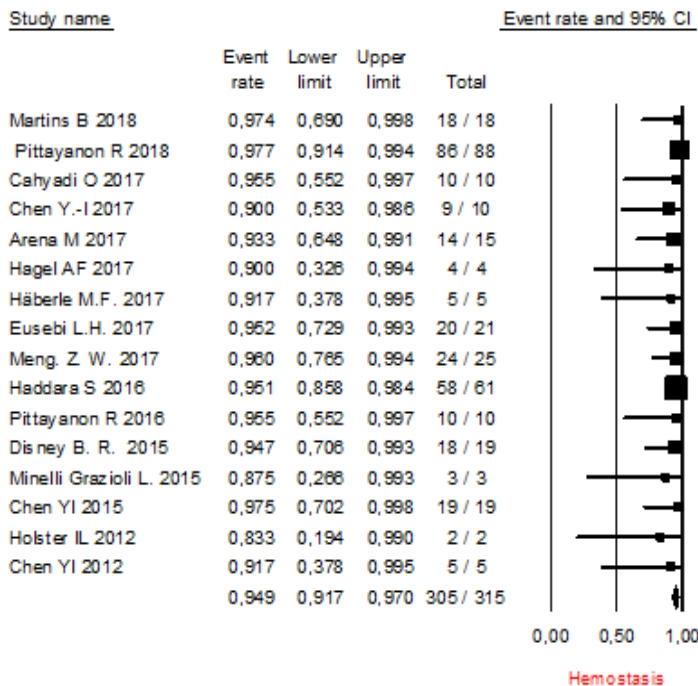

Fig. 5s Initial hemostasis rates after TC-325 use in bleeding from neoplasms.

## Neoplasm - Rebleeding

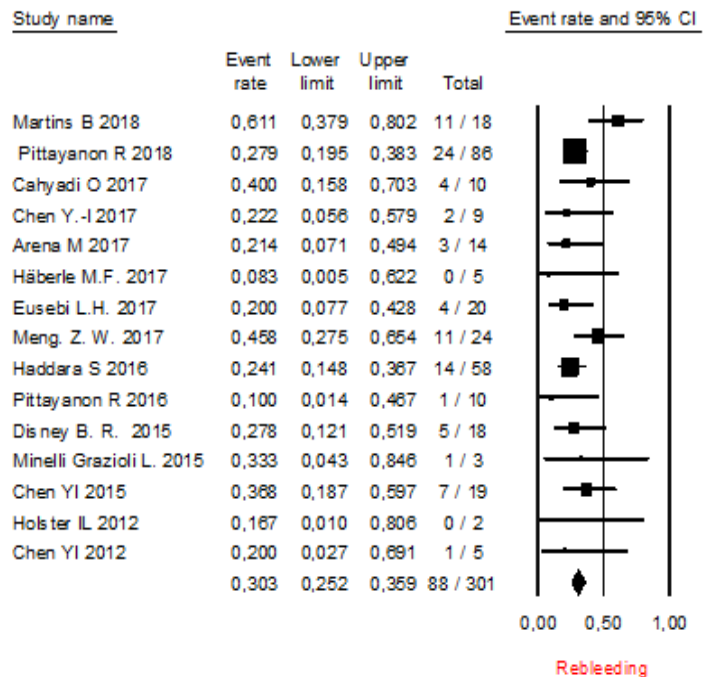

Fig. 6s Rebleeding rates after TC-325 use in bleeding from neoplasms.

## Esophageal varices - Hemostasis

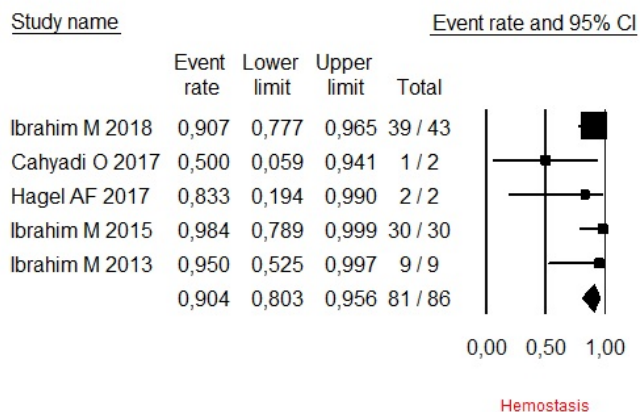

**Fig. 7s** Initial hemostasis rates after TC-325 use in bleeding from esophageal varices.

## Esophageal varices - Rebleeding

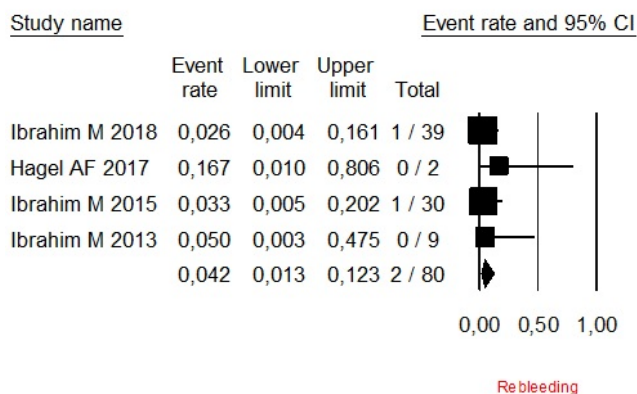

**Fig. 8s** Rebleeding rates after TC-325 use in bleeding from esophageal varices.

## Primay therapy - Hemostasis

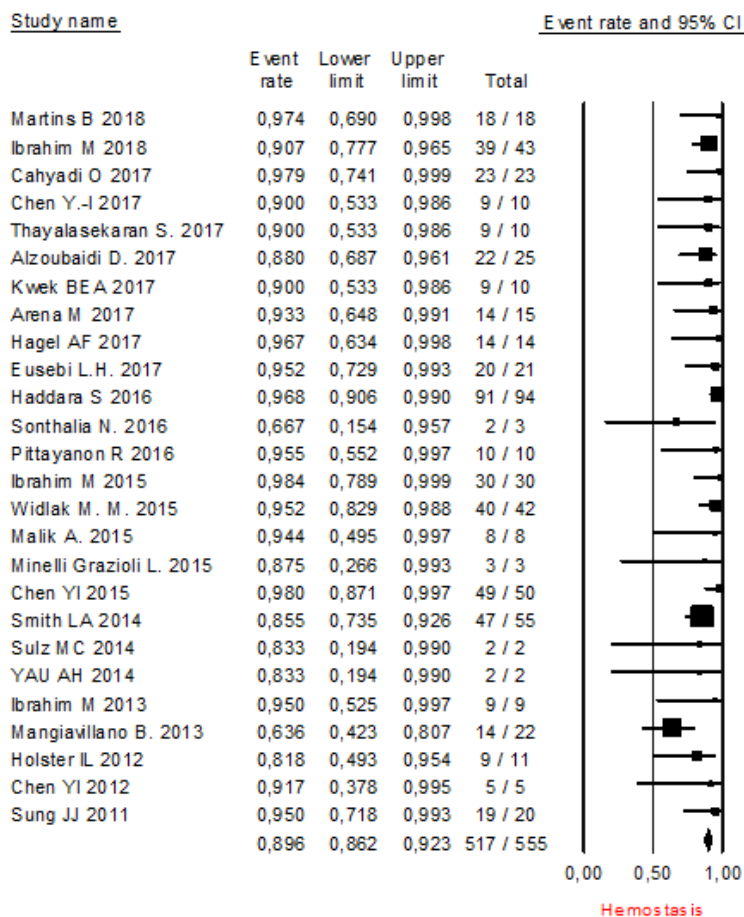

**Fig. 9s** Initial hemostasis rates after TC-325 use as primary therapy.

## Primay therapy - Rebleeding

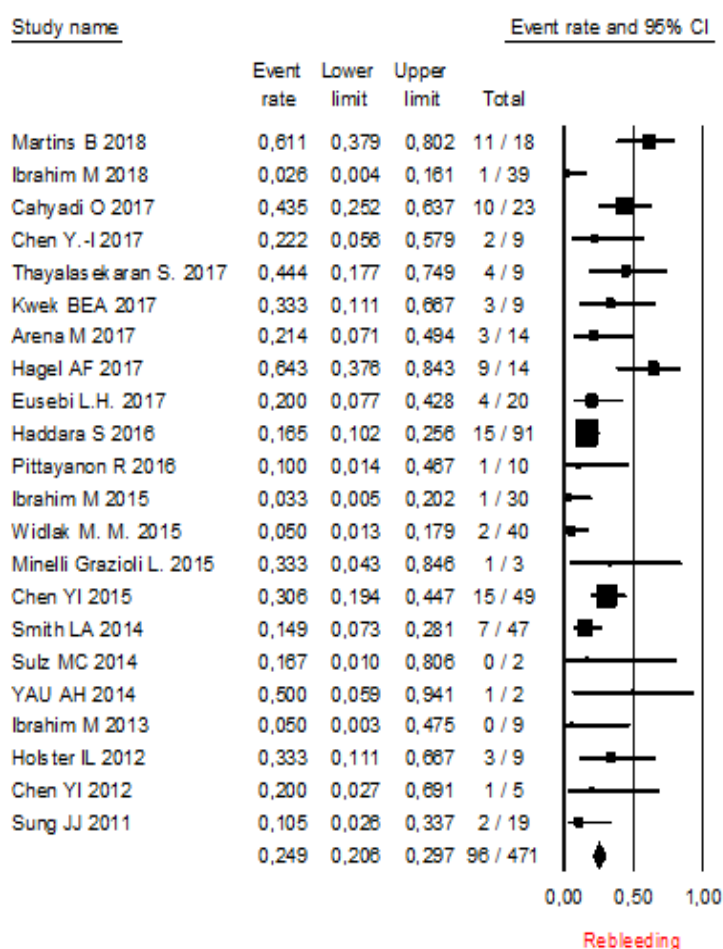

**Fig. 10s** Rebleeding rates after TC-325 use as primary therapy.



## Rescue therapy - Hemostasis

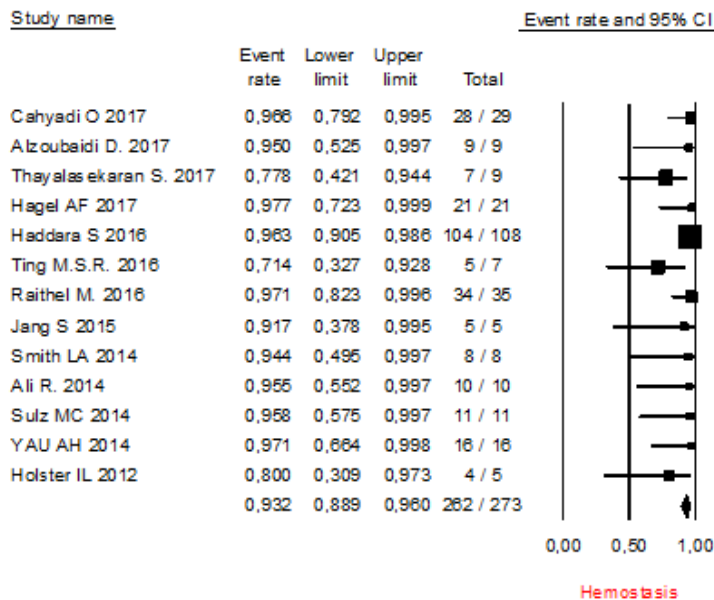

Fig. 11s Initial hemostasis rates after TC-325 use as rescue therapy.

## Rescue therapy - Rebleeding

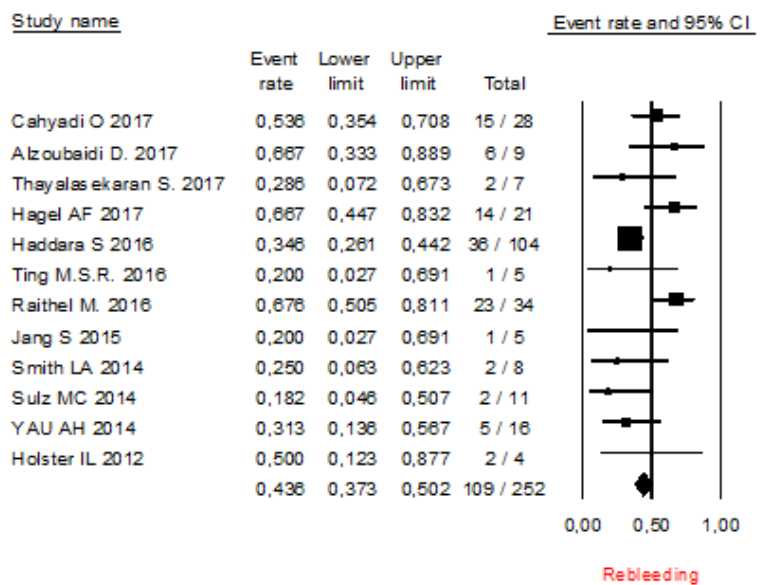

Fig. 12s Rebleeding rates after TC-325 use as rescue therapy.

## Anticoagulant - Hemostasis

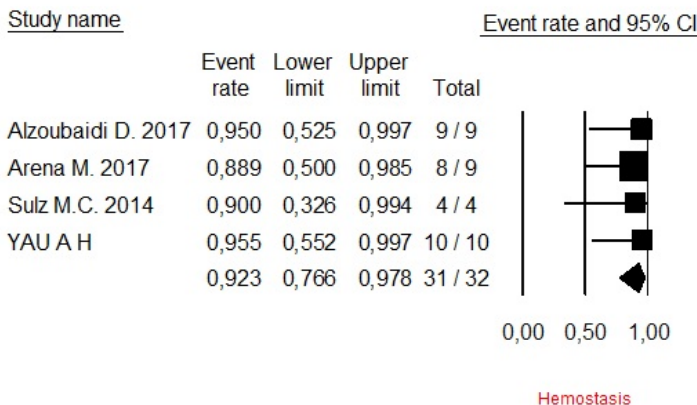

Fig. 13s Initial hemostasis rates after TC-325 use in patients on anticoagulation therapy.
